# Supplementary material for: Rye and Rye Bran as Components of Diets in Piglet Production—Effects on Salmonella Prevalence
Source: MDPI journal article supplement (doi:10.3390/ani13142262), 2023-07-10
Supplement: s1 [file s1]

**Table S1.** Nutrient composition of compound feeds at farm A (g/kg as fed).

| Energy and nutritional content (g/kg ) | Gilt integration |      | Farrowing unit |      | Piglet rearing |      |
|----------------------------------------|------------------|------|----------------|------|----------------|------|
|                                        | Control          | Rye  | Control        | Rye  | Control        | Rye  |
| MJ (ME/kg as fed)]                     | 12.6             | 12.6 | 13.4           | 13.4 | 13.5           | 13.5 |
| Crude Protein [g/kg]                   | 17.0             | 17.0 | 17.5           | 17.5 | 16.8           | 16.8 |
| Crude Fat [g/kg]                       | 3.0              | 3.5  | 5.7            | 6.0  | 4.5            | 4.6  |
| Crude Fiber[g/kg]                      | 5.8              | 5.8  | 5.0            | 5.0  | 4.0            | 4.0  |
| Crude Ash [g/kg]                       | 5.8              | 5.9  | 6.0            | 5.7  | 4.7            | 4.7  |
| Ca [g/kg]                              | 0.8              | 0.7  | 0.85           | 0.85 | 0.69           | 0.69 |
| P [g/kg]                               | 0.6              | 0.53 | 0.65           | 0.65 | 0.53           | 0.53 |
| Na [g/kg]                              | 0.25             | 0.25 | 0.25           | 0.25 | 0.23           | 0.23 |
| Lys [g/kg]                             | 0.95             | 0.95 | 1.05           | 1.05 | 1.27           | 1.27 |
| Met [g/kg]                             | 0.29             | 0.25 | 0.35           | 0.35 | 0.43           | 0.43 |

**Table S2.** Nutrient composition of compound feeds at farm A (rye bran) (g/kg as fed).

| Energy and nutritional content (g/kg ) | Gilt integration |          | Farrowing unit |          |
|----------------------------------------|------------------|----------|----------------|----------|
|                                        | Control          | Rye bran | Control        | Rye bran |
| MJ (ME/kg as fed)]                     | 12.6             | 12.6     | 13.4           | 13.4     |
| Crude Protein [g/kg]                   | 17               | 17       | 17.5           | 17.5     |
| Crude Fat [g/kg]                       | 3.0              | 3.0      | 5.7            | 5.7      |
| Crude Fiber[g/kg]                      | 5.8              | 5.8      | 5.0            | 5.0      |
| Crude Ash [g/kg]                       | 5.8              | 5.9      | 6.0            | 5.8      |
| Ca [g/kg]                              | 0.8              | 0.7      | 0.85           | 0.85     |
| P [g/kg]                               | 0.6              | 0.53     | 0.65           | 0.65     |
| Na [g/kg]                              | 0.25             | 0.25     | 0.25           | 0.25     |
| Lys [g/kg]                             | 0.95             | 0.95     | 1.05           | 1.05     |
| Met [g/kg]                             | 0.29             | 0.25     | 0.35           | 0.35     |

**Table S3.** Nutrient composition of compound feeds at farm B (g/kg as fed).

| Energy and nutritional content (g/kg ) | Gilt integration |      | Farrowing unit |      | Piglet rearing |      |
|----------------------------------------|------------------|------|----------------|------|----------------|------|
|                                        | Control          | Rye  | Control        | Rye  | Control        | Rye  |
| MJ (ME/kg as fed)]                     | 12.2             | 12.1 | 13.0           | 13.0 | 13.7           | 13.6 |
| Crude Protein [g/kg]                   | 14.0             | 14.0 | 16.5           | 16.5 | 17.0           | 17.0 |
| Crude Fat [g/kg]                       | 3.4              | 3.2  | 4.5            | 4.1  | 5.0            | 5.0  |
| Crude Fiber[g/kg]                      | 7.0              | 7.0  | 5.50           | 4.9  | 3.8            | 3.8  |
| Crude Ash [g/kg]                       | 5.0              | 5.0  | 5.6            | 5.7  | 4.7            | 5.0  |
| Ca [g/kg]                              | 0.7              | 0.68 | 0.9            | 0.9  | 0.7            | 0.7  |
| P [g/kg]                               | 0.55             | 0.53 | 0.65           | 0.65 | 0.55           | 0.55 |
| Na [g/kg]                              | 0.25             | 0.21 | 0.25           | 0.25 | 0.25           | 0.25 |
| Lys [g/kg]                             | 0.75             | 0.72 | 1.0            | 1.0  | 1.35           | 1.35 |
| Met [g/kg]                             | 0.24             | 0.21 | 0.3            | 0.3  | 0.43           | 0.42 |

**Table S4.** Nutrient composition of compound feeds at farm C (g/kg as fed).

| <b>Energy and nutritional<br/>content (g/kg )</b> | <b>Gilt integration</b> |      | <b>Farrowing unit</b> |      | <b>Piglet rearing 1</b> |      | <b>Piglet rearing 2</b> |      |
|---------------------------------------------------|-------------------------|------|-----------------------|------|-------------------------|------|-------------------------|------|
|                                                   | Control                 | Rye  | Control               | Rye  | Control                 | Rye  | Control                 | Rye  |
| MJ (ME/kg as fed)]                                | 11.9                    | 11.9 | 13.2                  | 13.2 | 13.5                    | 13.5 | 13.4                    | 13.4 |
| Crude Protein [g/kg]                              | 16                      | 16   | 17                    | 17   | 16.8                    | 16.8 | 16.4                    | 16.4 |
| Crude Fat [g/kg]                                  | 3.7                     | 3.1  | 3.9                   | 4    | 4.0                     | 4.6  | 3.4                     | 3.4  |
| Crude Fiber[g/kg]                                 | 6.8                     | 6.2  | 4.9                   | 4.9  | 4.0                     | 4.0  | 4.1                     | 4.1  |
| Crude Ash [g/kg]                                  | 5.5                     | 5.8  | 5.7                   | 5.8  | 4.7                     | 4.7  | 4.6                     | 4.6  |
| Ca [g/kg]                                         | 0.7                     | 0.7  | 0.85                  | 0.85 | 0.69                    | 0.69 | 0.7                     | 0.7  |
| P [g/kg]                                          | 0.55                    | 0.55 | 0.55                  | 0.55 | 0.53                    | 0.53 | 0.47                    | 0.47 |
| Na [g/kg]                                         | 0.2                     | 0.2  | 0.25                  | 0.25 | 0.23                    | 0.23 | 0.23                    | 0.23 |
| Lys [g/kg]                                        | 0.8                     | 0.8  | 0.95                  | 0.95 | 1.27                    | 1.27 | 1.15                    | 1.15 |
| Met [g/kg]                                        | 0.28                    | 0.28 | 0.32                  | 0.32 | 0.43                    | 0.43 | 0.36                    | 0.36 |
